# Supplementary material for: Dose-dependent decrease in anti-oxidant capacity of whole blood after irradiation: A novel potential marker for biodosimetry
Source: PubMed Central journal article supplement (PMC5943295; doi:10.1038/s41598-018-25650-y), 2018-05-09
Supplement: 41598_2018_25650_MOESM1_ESM.pdf [file 41598_2018_25650_MOESM1_ESM.pdf]

**Dose-dependent decrease in anti-oxidant capacity of whole blood after irradiation: A novel potential marker for biodosimetry**

Lue Sun<sup>1,2</sup>, Yohei Inaba<sup>3,4</sup>, Keizo Sato<sup>5</sup>, Aki Hirayama<sup>6</sup>, Koji Tsuboi<sup>1</sup>, Ryuji Okazaki<sup>2</sup>, Koichi Chida<sup>3,4</sup> and Takashi Moritake<sup>2,\*</sup>

<sup>1</sup>Department of Radiation Biology, Faculty of Medicine, University of Tsukuba, 1-1-1 Tennodai, Tsukuba, Ibaraki 305-0006, Japan

<sup>2</sup>Department of Radiological Health Science, Institute of Industrial Ecological Sciences, University of Occupational and Environmental Health, Japan, 1-1 Iseigaoka, Yahatanishi-ku, Kitakyushu, Fukuoka 807-8555, Japan

<sup>3</sup>Course of Radiological Technology, Health Sciences, Tohoku University Graduate School of Medicine, 2-1 Seiryō, Aoba, Sendai, Miyagi 980-8575, Japan

<sup>4</sup>Department of Radiation Disaster Medicine, International Research Institute of Disaster Science, Tohoku University, Aramaki Aza-Aoba 468-1, Aoba-ku, Sendai, 980-0845, Japan

<sup>5</sup>School of Pharmacy, Kyushu University of Health and Welfare, 1714-1 Yoshino Nobeoka, Miyazaki 882-8508, Japan

<sup>6</sup>Center for Integrative Medicine, Tsukuba University of Technology, Kasuga 4-12-7, Tsukuba 305-8521, Japan

\* moritake@med.uoeh-u.ac.jp

# Figure S1

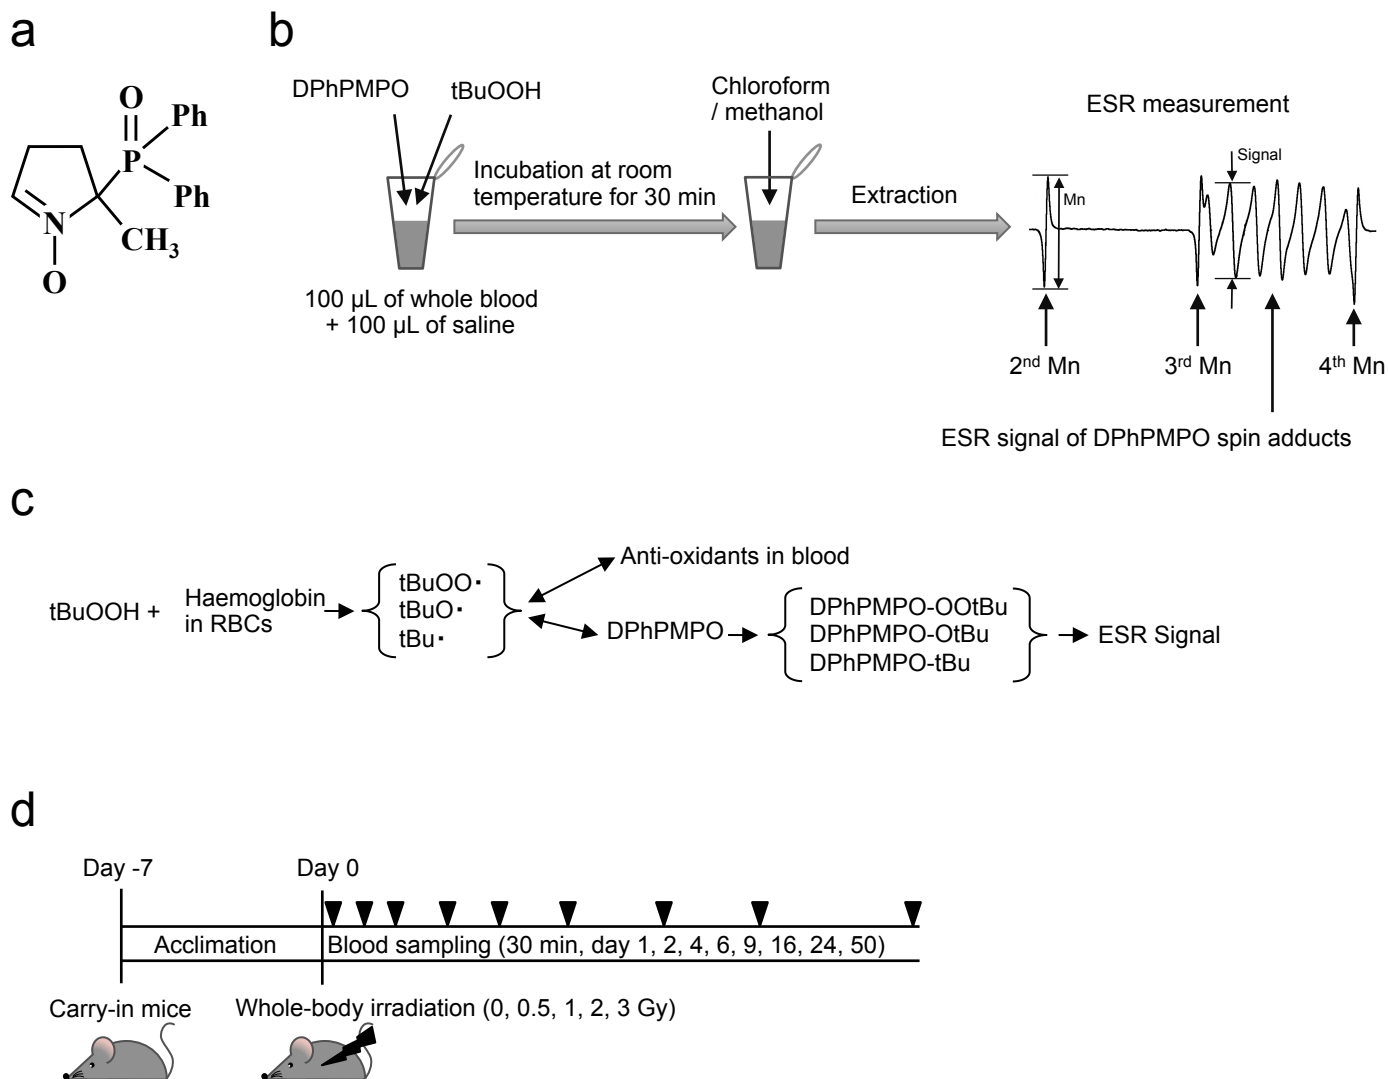

**Figure S1.** Schema of experiments. (a) Chemical structure of DPhPMPO. (b) Schema of i-Strap. (c) Radical generation and scavenging during i-Strap. (d) Protocol for mouse experiments.

# Figure S2

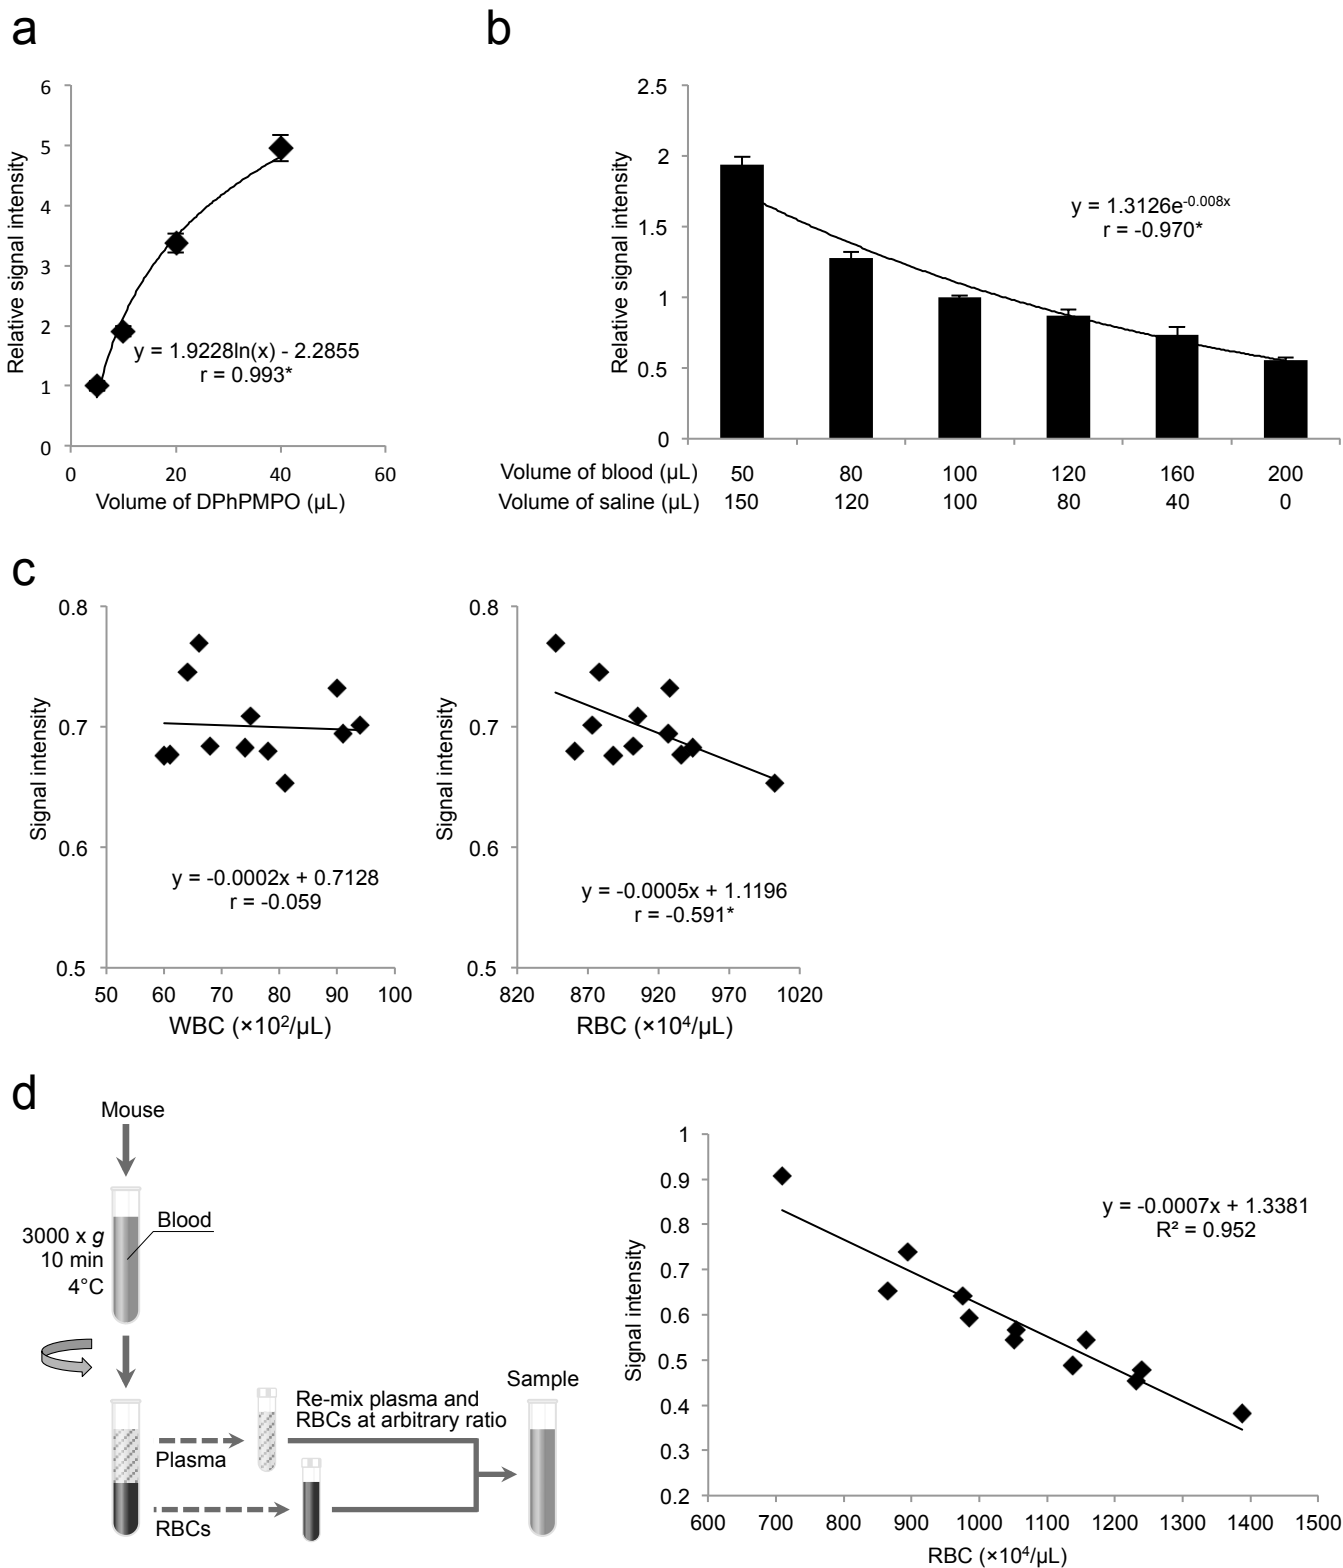

**Figure S2.** Characterisation of i-STrap. (a, b) Changes in signal intensity with changes in DPhPMPO dose (a) and blood/saline ratio (b). (c) Correlations between signal intensity and numbers of WBCs and RBCs in 12 healthy (non-irradiated) mice. (d) Correlation between signal intensity and number of RBCs in re-mixed blood samples. Quantitative data in (a) and (b) are means  $\pm$  SD ( $n = 3$ ). \* $P < 0.05$ , Pearson's correlation coefficient test.

# Figure S3

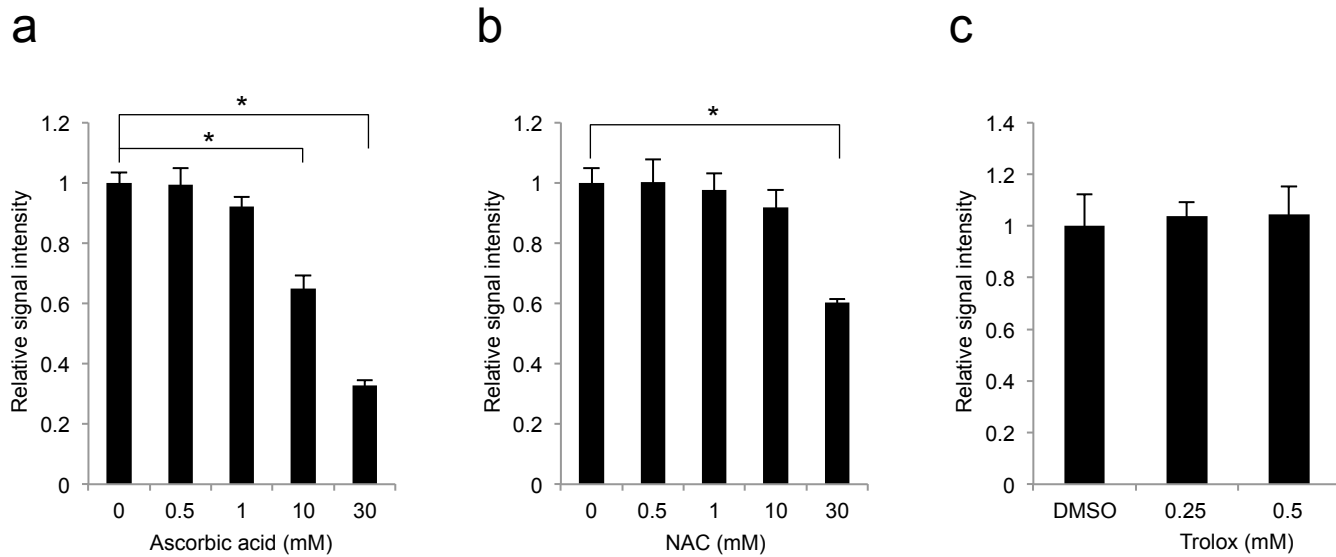

**Figure S3.** Changes in i-Strap signal intensity with changes in anti-oxidant dose. (a–c) Data for ascorbic acid (a), NAC (b), and Trolox (c). Quantitative data are means  $\pm$  SD (n = 3). \*P < 0.05, Welch's *t*-test.

# Figure S4

a

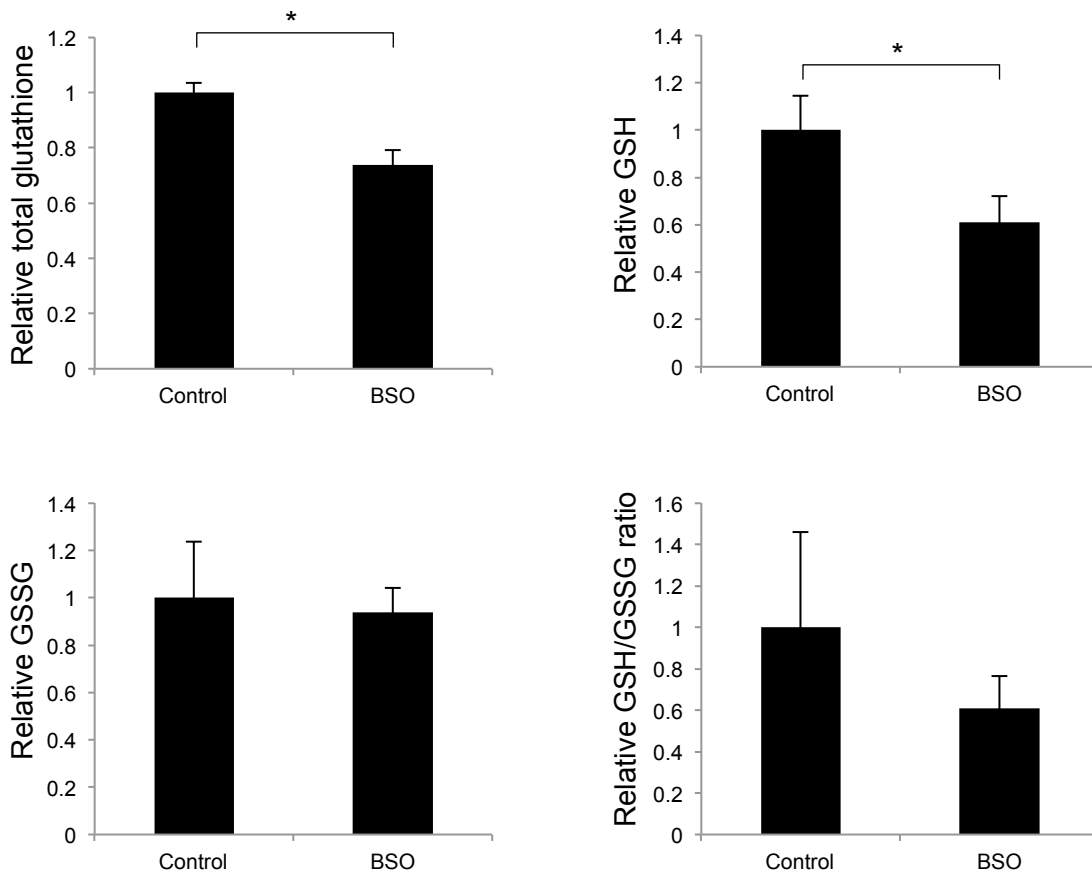

b

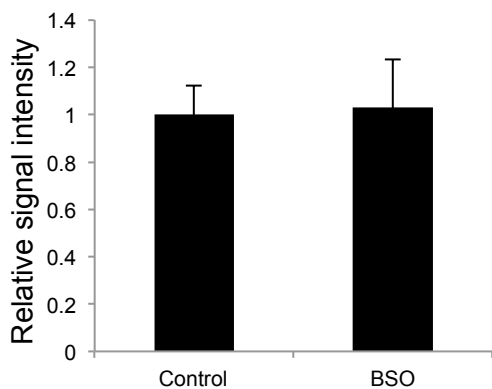

**Figure S4.** Changes in RBC glutathione level and whole-blood anti-oxidant capacity after BSO treatment. BSO (10 mM) was added to drinking water and administered to mice for 7 days. (a) RBC total glutathione, GSH, GSSG, and GSH/GSSG ratio after BSO treatment. (b) Whole-blood anti-oxidant capacity after BSO treatment measured using i-Strap. Quantitative data are means  $\pm$  SD (n = 6). \*P < 0.05, Welch's *t*-test.

# Figure S5

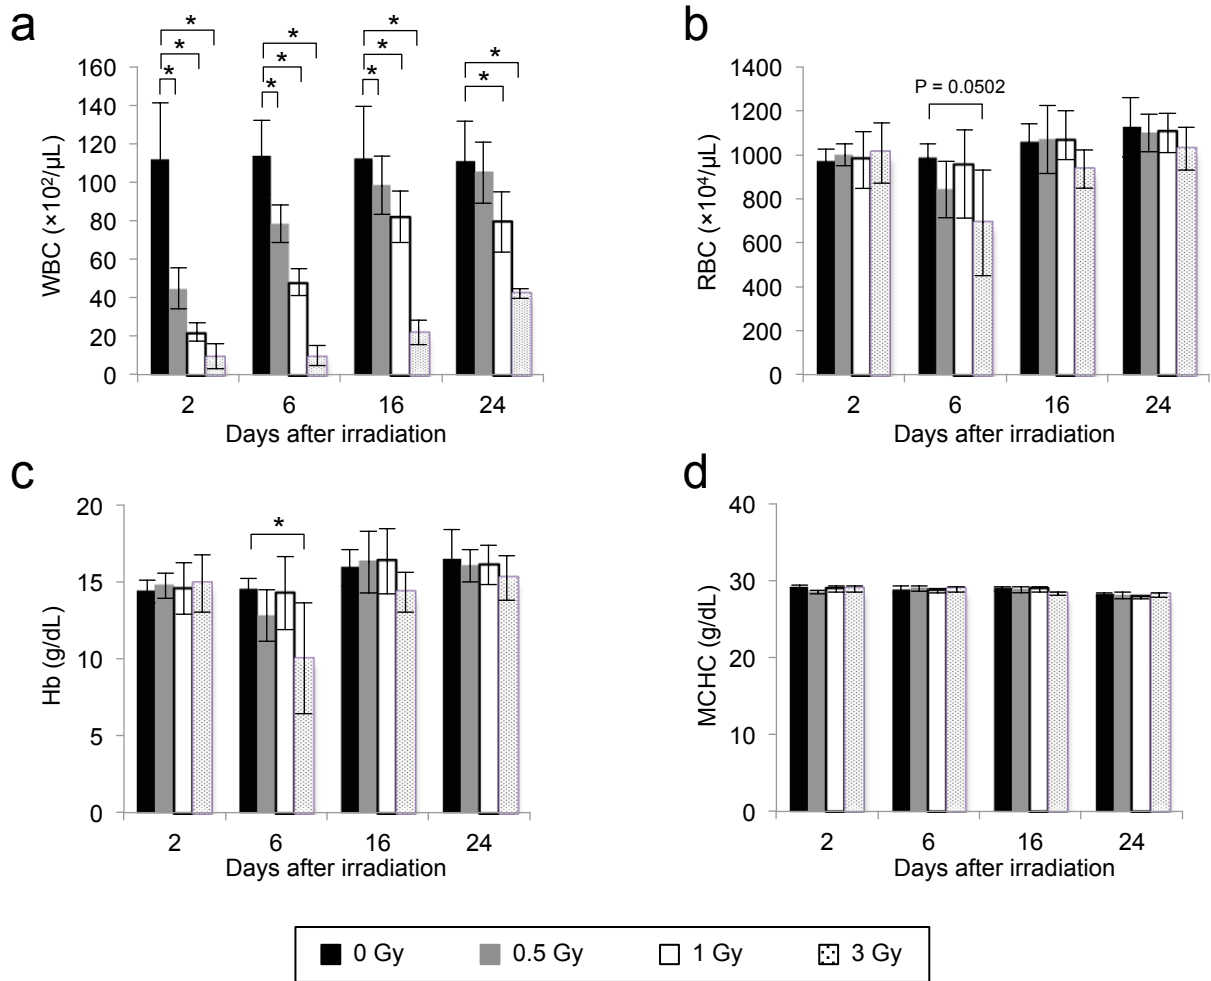

**Figure S5.** Changes in WBCs, RBCs, Hb, and MCHC after irradiation. (a–d) Changes in numbers of WBCs (a), numbers of RBCs (b), Hb (c), and MCHC (d). All quantitative data are means  $\pm$  SD ( $n = 5$ ). \* $P < 0.05$ , Welch's *t*-test.
